# Supplementary material for: pH-sensitive composite nanofibers of poly(ε-caprolactone) loaded with iron oxide nanoparticles/ammonium bicarbonate as a nanocarrier toward efficient doxorubicin release for postsurgical cancer treatment
Source: Royal Society of Chemistry journal article supplement (doi:10.1039/d3ma01026k), 2024-01-01
Supplement: d3ma01026k1.pdf [file d3ma01026k1.pdf]

**pH-sensitive composite nanofiber of Poly( $\epsilon$ -caprolactone) loaded with iron oxide nanoparticles/ammonium bicarbonate nanocarrier toward efficient doxorubicin release for postsurgical cancer treatment**

**Quang Nhat Quynh Vo<sup>1†</sup>, Abdelrahman I. Rezk<sup>1,2,3†</sup>, Sungkun Chun<sup>2,3\*</sup>, Chan Hee Park<sup>1,4\*</sup>, Cheol Sang Kim<sup>1,4\*</sup>**

<sup>1</sup>Department of Bionanotechnology and Bioconvergence Engineering, Graduate School, Jeonbuk National University, Jeonju 561–756, Republic of Korea,

<sup>2</sup>Department of Physiology, Jeonbuk National University Medical School, Jeonju-si 54907, Republic of Korea

<sup>3</sup>BK21FOUR 21st Century Medical Science Creative Human Resource Development Center, Republic of Korea

<sup>4</sup>Mechanical Design Engineering, Jeonbuk National University, Jeonju 561–756, Republic of Korea.

**\*Corresponding authors:**

Tel: +82 63 270 4284, Fax: +82 63 270 2460

Cheol Sang Kim ([chskim@jbnu.ac.kr](mailto:chskim@jbnu.ac.kr)), Chan Hee Park ([biochan@jbnu.ac.kr](mailto:biochan@jbnu.ac.kr)), Sungkun Chun ([sungkun.chun@jbnu.ac.kr](mailto:sungkun.chun@jbnu.ac.kr))

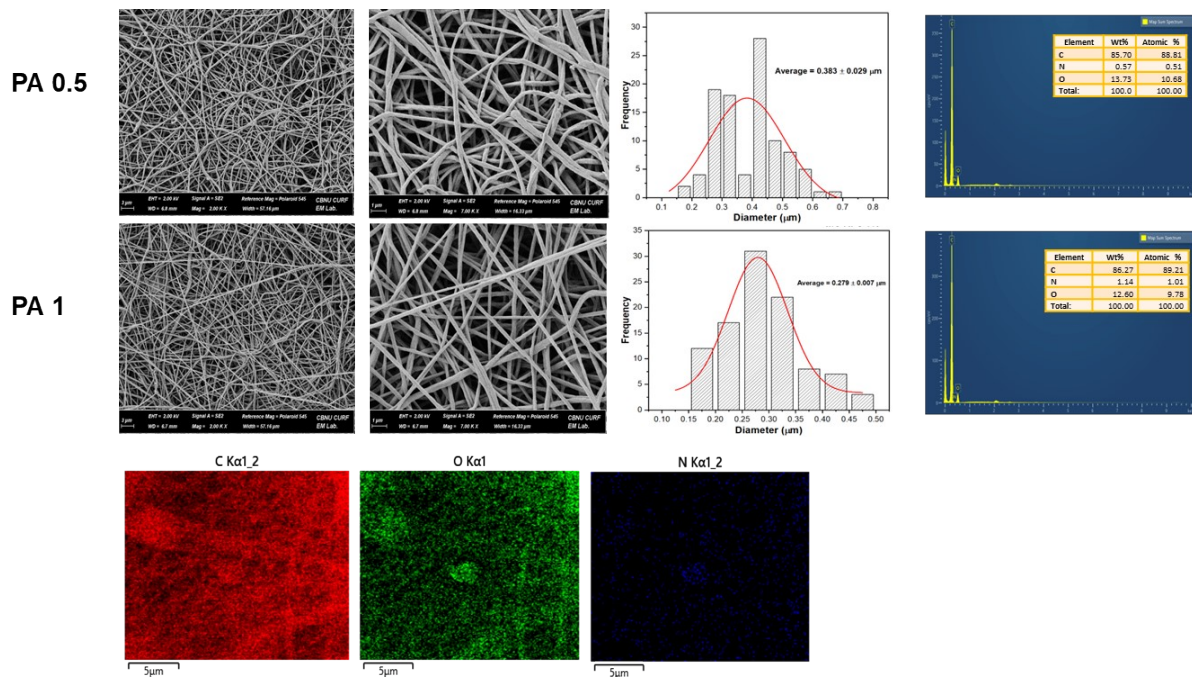

**Figure S1.** FESEM images, the average diameter of different mats at different magnifications and the elemental content results from EDX analysis of PA 0.5 and PA 1.

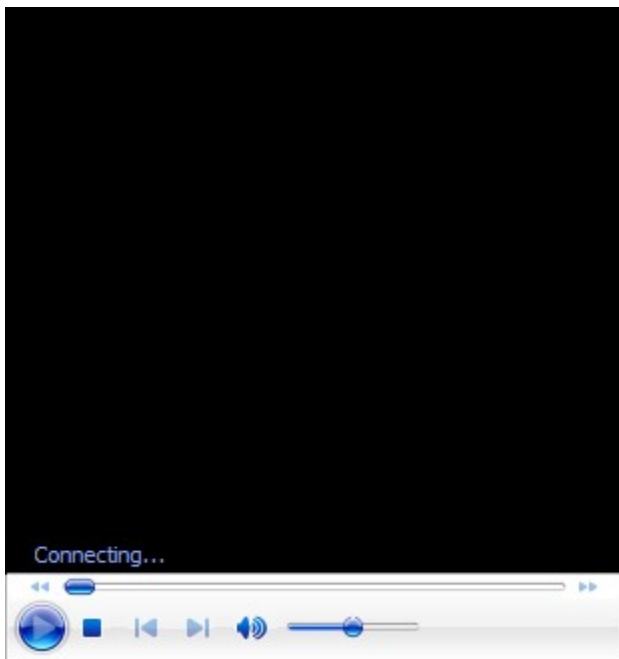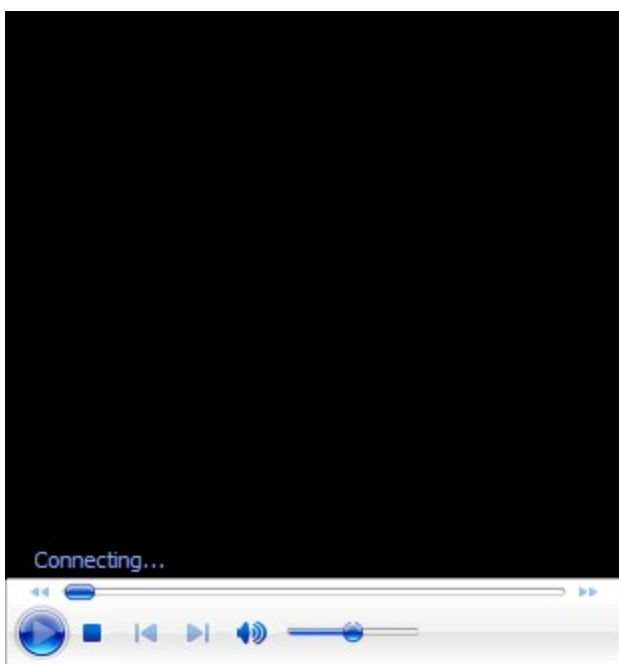

**Figure S2.** Magnetization effect of PIA.

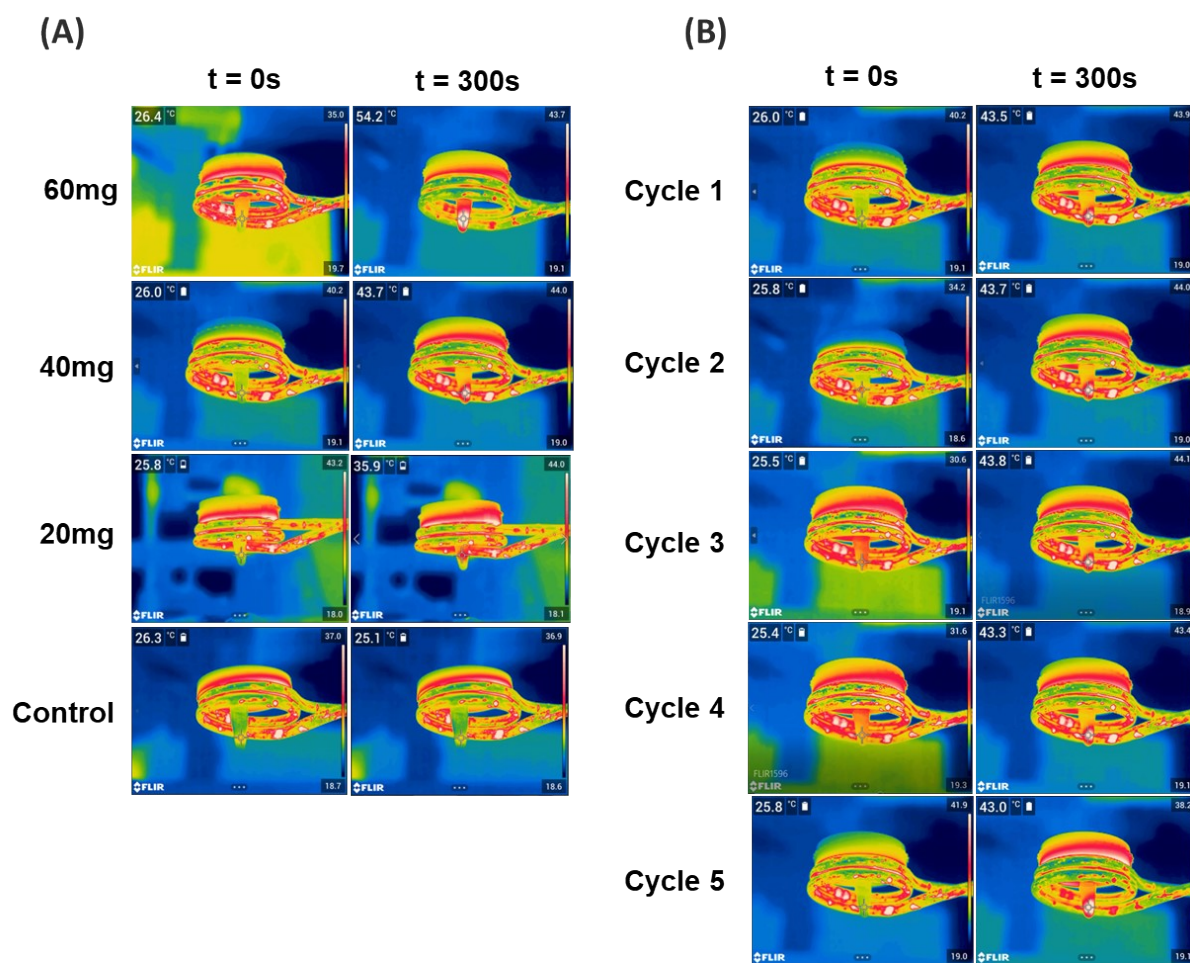

**Figure S3.** Thermographic images of (A) PIA mat at different sample weight; (B) stability test of PIA mat at 40 mg over 5 cycles of magnetic hyperthermia.

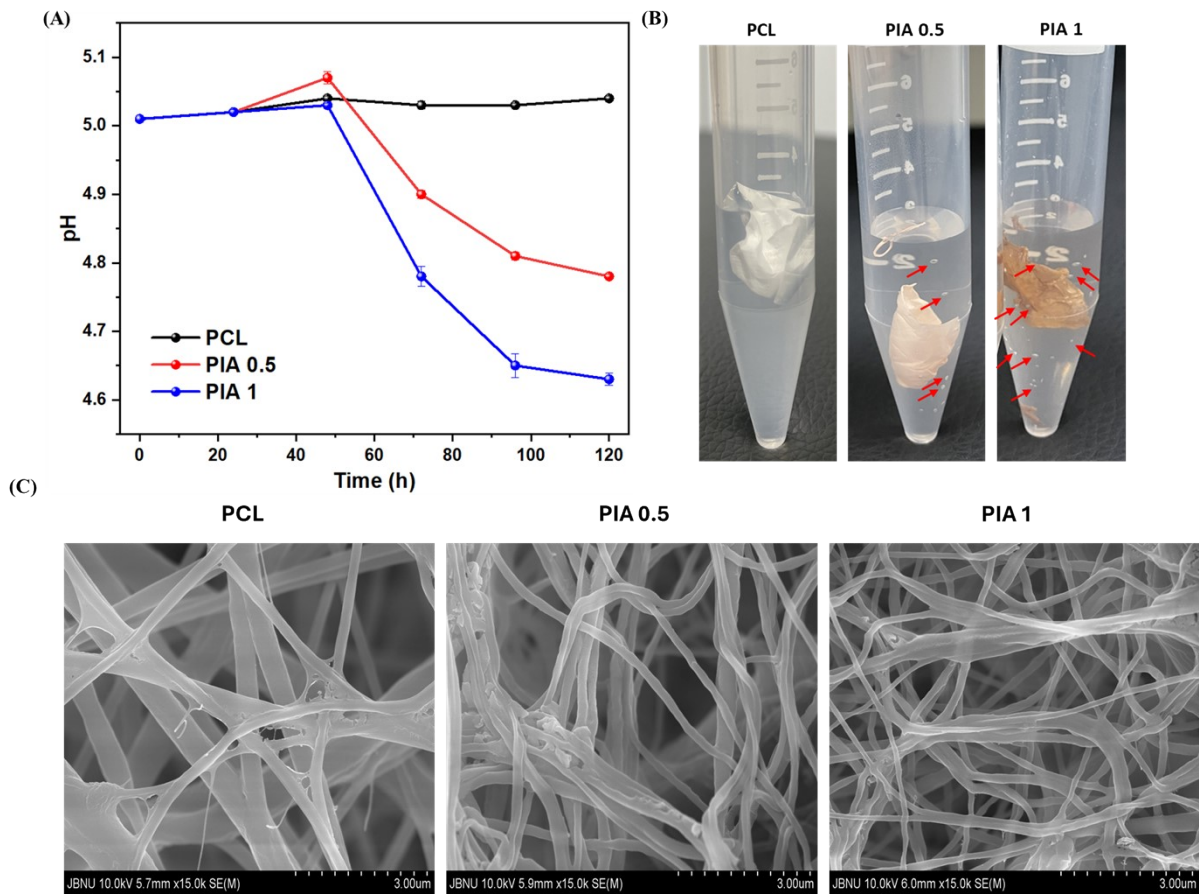

Figure S4. CO<sub>2</sub> production. (A) pH changes of immersed samples after specific time points, (B) digital images of PCL, PIA 0.5 and PIA 1 after immersion for 120 h, (C) SEM images of different mats after 120 h.
